# Supplementary material for: N-doped mesoporous inverse opal structures for visible-light photocatalysts
Source: Royal Society of Chemistry journal article supplement (doi:10.1039/c5ra13198g), 2015-01-01
Supplement: c5ra13198g1.pdf [file c5ra13198g1.pdf]

# N-doped Mesoporous Inverse Opal Structures for Visible-light Photocatalysts

*Su-Jin Ha, <sup>a</sup> Dong-Ha Kim<sup>b</sup> and Jun Hyuk Moon<sup>a,\*</sup>*

<sup>a</sup> Department of Chemical and Biomolecular Engineering, Sogang University, Seoul 121-742,  
Republic of Korea.

<sup>b</sup> Department of Chemistry and Nano Science, Ewha Womans University, Seoul 120-750,  
Republic of Korea

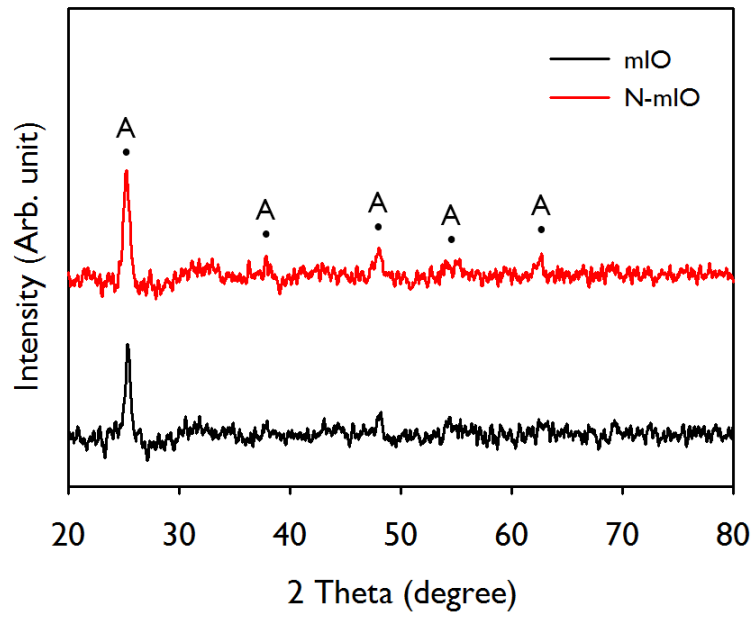

Figure S1. XRD spectra of the mIO and the N-mIO.

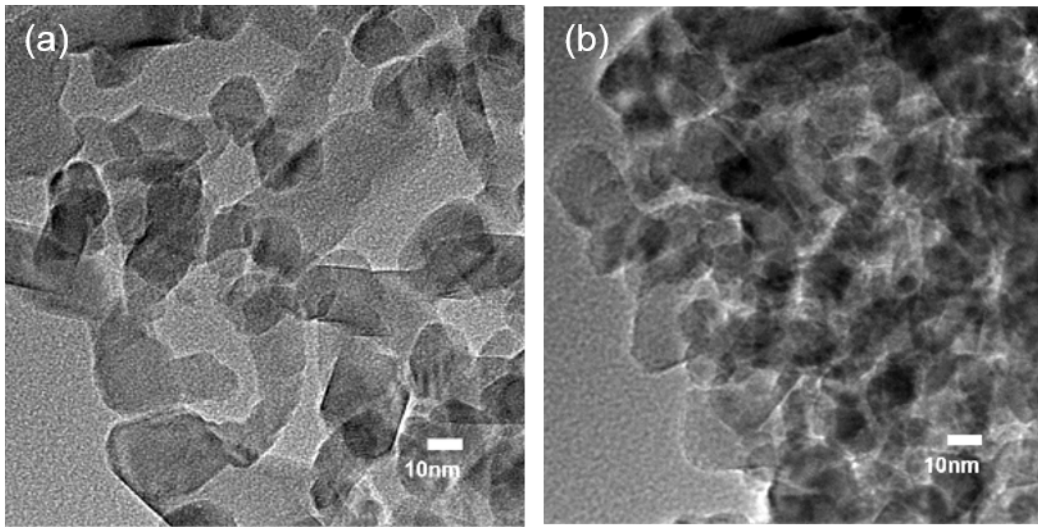

Figure S2. TEM images of (a) the mIO and (b) the N-mIO. No residue on the surface is observed after the doping.

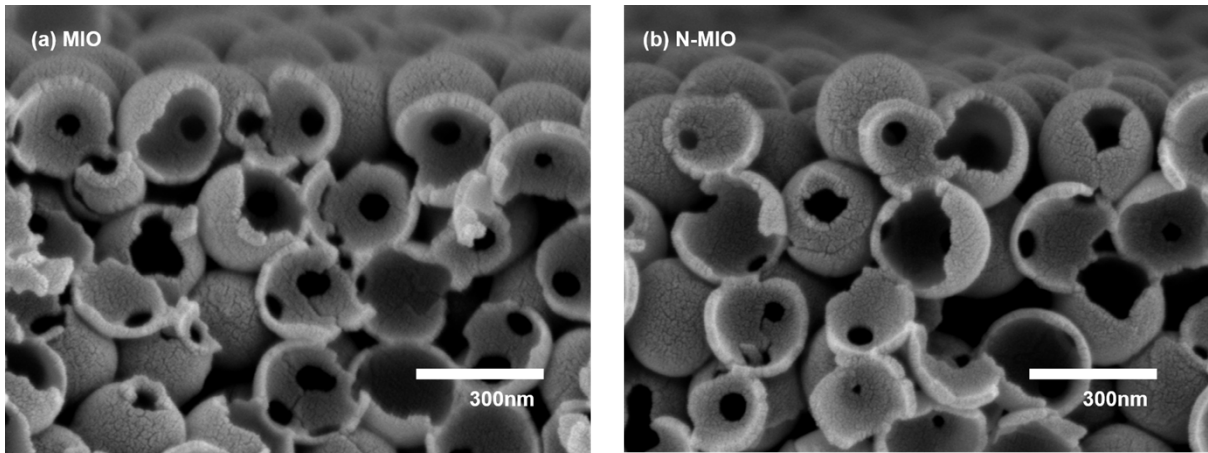

Figure S3. (a) SEM images of the macroporous  $\text{TiO}_2$  IO film (MIO). (b) SEM image of the N-doped macroporous  $\text{TiO}_2$  IO film (N-MIO). The N-MIO  $\text{TiO}_2$  film is prepared under the same conditions as the high-N-mIO  $\text{TiO}_2$  IO film.

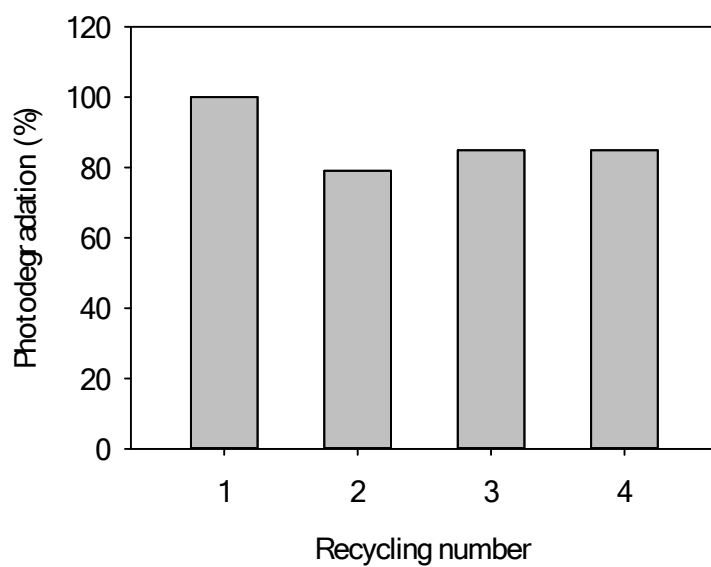

Figure S4. Recycling test of the N-mIO photocatalyst. The photodegradation of initial cycle was set to 100%. The photocatalyst was washed with ethanol and dried at 80°C after each cycle. The photodegradation for 2-4 cycle was maintained at 83% of that of initial cycle.

Table S1. EDX results showing the percentage of each component in mIO, low-N-mIO, and high-N-mIO.

| wt% | mIO   | low-N-mIO | high-N-mIO |
|-----|-------|-----------|------------|
| C   | 13.27 | 11.82     | 11.14      |
| N   | -     | 3.74      | 9.38       |
| O   | 69.72 | 66.08     | 63.49      |
| Ti  | 17.01 | 18.37     | 15.99      |
